# Supplementary material for: Evaluating whole-genome sequencing quality metrics for enteric pathogen outbreaks
Source: PeerJ. 2021 Nov 25;9:e12446. doi: 10.7717/peerj.12446 (PMC8627651; doi:10.7717/peerj.12446)
Supplement: Supplemental Information 9 [file peerj-09-12446-s009.xlsx]

## Sheet: Sheet1
Salmonella enterica ser. Reading (cluster 2) with quality metrics
				read metrics								SPAdes assembly metrics			Skesa assembly metrics			SNP mapping metrics				raw
	treatment	chemistry	readCountR1plusR2	qualR1avg	qualR2avg	PercentR1Ambig	PercentR2Ambig	depth	readLength	avgInsert	medianInsert	contigCount.SPAdes	N50.SPAdes	maxContig.SPAdes	contigCount.Skesa	N50.Skesa	maxContig.Skesa	LyveSET.percentMap	lyveSET.properlyPaired	cfsan.percentMap		qualR1avg	qualR2avg	readLength	medianInsert	contigCount.SPAdes	N50.SPAdes	maxContig.SPAdes	contigCount.Skesa	N50.Skesa	maxContig.Skesa	LyveSET.percentMap	lyveSET.properlyPaired	cfsan.percentMap
APHI_17-9019_S33_raw_65x	raw	500cyc	1492028	34.11	29.5	0.00428946	0.00254687	55.08	199.02	228.77	200	70	151881	363111	105	82070	264275	0.7797	0.6743	0.8446		34.1524	30.1767	226.258	290.429	95.9524	243104	552950	194.429	117216	321911	0.785148	0.545019	0.877305
APHI_17-6335_S26_raw_65x	raw	500cyc	1348204	33.55	32.44	0.00370864	0.00267022	58.93	221.08	291.17	264	42	224086	547368	66	134545	257198	0.9285	0.4691	0.9792						Wilcox less than Skesa	Wilcox greater than Skesa	Wilcox greater than Skesa
APHI_17-10375_S35_raw_65x	raw	500cyc	1322886	33.38	29.65	0.00423317	0.00317488	38.93	219.2	271.87	248	148	73979	168270	280	28351	114860	0.6679	0.4383	0.7718						p = 0.0002407	p = 4.768e-07	p = 4.768e-07
APHI_17-10777_S37_raw_65x	raw	500cyc	1307264	32.52	27.48	0.00321282	0.00107094	33.22	222.81	276.39	255	266	28822	97074	1019	6851	29736	0.565	0.3463	0.707
APHI_17-12383_S27_raw_65x	raw	500cyc	1294770	33.77	27.82	0.00370722	0.00247148	37.56	224.9	281.35	261	237	33796	96490	486	15980	60435	0.5444	0.3444	0.6711						qualR1 vs contigCount.SPAdes	qualR1 vs N50.SPAdes	qualR1 vs maxContig.SPAdes	qualR1 vs contigCount.Skesa	qualR1 vs N50.Skesa	qualR1 vs maxContig.Skesa
APHI_17-12727_S28_raw_65x	raw	500cyc	1244968	33.81	29.21	0.0048194	0.00401617	33.11	233.33	325.7	310	207	50164	188184	349	22275	116198	0.5812	0.4234	0.7014						-0.436708	0.455844	0.525908	-0.437155	0.442857	0.436364
APHI_17-12897_S29_raw_65x	raw	500cyc	1255578	33.51	29.45	0.00509725	0.00207076	32.23	230.53	308.48	288	140	73066	229467	326	24687	84033	0.6145	0.4253	0.7444						qualR2 vs contigCount.SPAdes	qualR2 vs N50.SPAdes	qualR2 vs maxContig.SPAdes	qualR2 vs contigCount.Skesa	qualR2 vs N50.Skesa	qualR2 vs maxContig.Skesa
APHI_17-13313_S30_raw_65x	raw	500cyc	1241756	33.63	28.73	0.00756993	0.00402656	29.64	235.01	325.92	313	248	37555	140043	543	14254	74310	0.5597	0.3988	0.6867						-0.411459	0.465736	0.485009	-0.433398	0.43001	0.433258
APHI_18-154_S31_raw_65x	raw	500cyc	1299094	33.36	30.52	0.00477256	0.00292512	35.77	218.88	277.73	253	43	272740	547368	87	92016	275115	0.895	0.6187	0.9729						Ns vs contigCount.SPAdes	Ns vs N50.SPAdes	Ns vs maxContig.SPAdes	Ns vs contigCount.Skesa	Ns vs N50.Skesa	Ns vs maxContig.Skesa
CVM_N17S1018_raw_65x	raw	600cyc	1258918	34.35	29.21	0.000794333	0.958442	52.14	234.38	272.9	228	36	455001	758346	34	257417	510366	0.8834	0.5328	0.9679						-0.189477	0.146195	0.0701077	-0.19379	0.191566	0.155558
CVM_N17S1019_raw_65x	raw	600cyc	1247780	34	30.05	0.000160285	1.01653	54.81	236.69	275.45	236	38	344457	547368	54	163445	344388	0.8985	0.5542	0.9739						readLength vs contigCount.SPAdes	readLength vs N50.SPAdes	readLength vs maxContig.SPAdes	readLength vs contigCount.Skesa	readLength vs N50.Skesa	readLength vs maxContig.Skesa
CVM_N17S1020_raw_65x	raw	600cyc	1187138	34.17	29.61	0.000505417	1.01538	46.92	245.13	291.33	253	40	398248	758653	37	202608	555283	0.8767	0.5457	0.9674						-0.309796	0.366234	0.43011	-0.346866	0.341558	0.332468
CVM_N17S1021_raw_65x	raw	600cyc	1279898	34.07	29.6	0.000468787	1.00852	51.61	228.41	257.73	218	40	450153	758653	40	223983	547366	0.8937	0.5314	0.97						medianInsert vs contigCount.SPAdes	medianInsert vs N50.SPAdes	medianInsert vs maxContig.SPAdes	medianInsert vs contigCount.Skesa	medianInsert vs N50.Skesa	medianInsert vs maxContig.Skesa
PNUSAS033882-NC-M5236-180215_raw_65x	raw	500cyc	1438988	35.16	32.09	2.14428	7.01743	58.74	206.14	295.62	258	49	222776	450548	98	91726	215942	0.8925	0.5639	0.9483						0.149089	-0.0604092	0.0847462	0.141325	-0.139656	-0.139006
PNUSAS034531-LAC-M05385-180221_raw_65x	raw	500cyc	1634496	33.95	30.67	4.88909	3.35847	56.07	180.64	208.55	175	49	217959	547368	77	111609	314297	0.8458	0.7347	0.9086
PNUSAS034535-NC-M5236-180215_raw_65x	raw	500cyc	1426630	35.14	32.76	2.12935	7.03504	59.19	207.8	287.89	254	82	129044	269307	145	61112	192055	0.9128	0.6323	0.9632
PNUSAS031958-TX_raw_65x_oSeven	raw	500cyc	1259868	35.69	29.81	0.000634987	0.000158747	50.49	236.36	367.31	347	38	295954	798547	59	154346	338521	0.8082	0.5127	0.9556
PNUSAS032349-OR_raw_65x_oFiver	raw	500cyc	1250560	34.13	31.84	0.000639713	0.000639713	58.45	238.74	373.98	348	38	637471	1787855	24	396938	1234155	0.8945	0.6507	0.9658
PNUSAS036521-MI_raw_65x_oTh	raw	500cyc	1199910	35.27	31.42	0.000333358	0.000666717	46.71	244.97	552.21	531	115	128833	384363	126	66919	202894	0.6971	0.5765	0.796
PNUSAS036910-GA_raw_65x_oFiver	raw	500cyc	1224908	34.54	32.14	0.000979665	0.000163278	57.64	243.2	468.14	451	43	637175	1530025	41	198980	804066	0.8912	0.7736	0.9631
PNUSAS037915-MN_raw_65x_oDf	raw	500cyc	1222522	35.09	29.71	0.000490789	0.000327192	55.6	244.2	423.78	408	46	242028	643536	87	111434	224630	0.8578	0.6983	0.9645		noNmin100
APHI_17-9019_S33_noNmin100_65x_thr	noNmin100	500cyc	1428456	34.12	29.49	0	0	54.98	208	242.49	211	69	155049	482065	108	78677	258184	0.6654	0.6797	0.8419		qualR1avg	qualR2avg	readLength	medianInsert	contigCount.SPAdes	N50.SPAdes	maxContig.SPAdes	contigCount.Skesa	N50.Skesa	maxContig.Skesa	LyveSET.percentMap	lyveSET.properlyPaired	cfsan.percentMap
APHI_17-6335_S26_noNmin100_65x_thver	noNmin100	500cyc	1320872	33.55	32.44	0	0	58.82	225.33	298.43	269	38	329700	576601	61	128475	343675	0.5613	0.4728	0.9791		34.1733	30.201	232.347	298.048	99.6667	246049	580851	189.19	124426	326179	0.782695	0.550114	0.877605
APHI_17-10375_S35_noNmin100_65x_thr	noNmin100	500cyc	1297140	33.38	29.65	0	0	39.21	223.94	275.35	249	141	81716	274850	264	29889	95177	0.5408	0.4414	0.7724
APHI_17-10777_S37_noNmin100_65x_thr	noNmin100	500cyc	1284084	32.53	27.48	0	0	26.58	226.77	278.05	255	283	29491	92908	1013	6865	33104	0.5785	0.3467	0.7065
APHI_17-12383_S27_noNmin100_65x_thver	noNmin100	500cyc	1270598	33.78	27.8	0	0	33.24	229.4	281.11	263	249	36476	132868	466	17261	91449	0.6106	0.3446	0.6707
APHI_17-12727_S28_noNmin100_65x_fiver	noNmin100	500cyc	1228250	33.81	29.19	0	0	34.17	236.88	329.26	311	215	47840	188372	350	24271	144445	0.5575	0.4252	0.7013
APHI_17-12897_S29_noNmin100_65x_df	noNmin100	500cyc	1237672	33.51	29.45	0	0	32.41	234.28	314.41	292	145	63476	226651	321	25799	106920	0.7729	0.4264	0.7436
APHI_17-13313_S30_noNmin100_65x_thr	noNmin100	500cyc	1223736	33.64	28.72	0	0	30.46	238.72	337.99	321	244	36964	137880	515	14397	64042	0.9269	0.4015	0.6867
APHI_18-154_S31_noNmin100_65x_df	noNmin100	500cyc	1267174	33.37	30.51	0	0	36.74	224.22	283.43	257	44	212058	395859	78	98599	380436	0.892	0.6235	0.9727
CVM_N17S1018_noNmin100_65x_fiver	noNmin100	600cyc	1218876	34.38	29.31	0	0	52.22	241.65	284.16	238	36	398248	672606	39	246227	510321	0.882	0.5388	0.9696
CVM_N17S1019_noNmin100_65x_fiver	noNmin100	600cyc	1211070	34.05	30.17	0	0	54.84	242.97	284.64	244	31	396403	758653	41	257378	594735	0.8993	0.5626	0.9766
CVM_N17S1020_noNmin100_65x_df	noNmin100	600cyc	1162640	34.22	29.73	0	0	47.16	250.26	300.3	259	41	504258	758659	46	190158	312840	0.8774	0.552	0.9698
CVM_N17S1021_noNmin100_65x_thr	noNmin100	600cyc	1235616	34.13	29.74	0	0	51.68	235.84	269.54	227	37	389563	758659	41	282615	436576	0.8932	0.5373	0.9722
PNUSAS033882-NC-M5236-180215_noNmin100_65x_df	noNmin100	500cyc	1343710	35.19	32.11	0	0	58.6	220.48	320.45	281	49	222600	440548	87	106143	231243	0.8882	0.5655	0.9491
PNUSAS034531-LAC-M05385-180221_noNmin100_65x_thver	noNmin100	500cyc	1464462	34.08	30.75	0	0	56.41	202.14	239.4	202	45	267064	455101	67	123980	395411	0.8395	0.7377	0.9102
PNUSAS034535-NC-M5236-180215_noNmin100_65x_thr	noNmin100	500cyc	1356806	35.17	32.78	0	0	59.57	218.99	306.28	270	73	129060	383475	134	70375	267341	0.9101	0.6497	0.9634
PNUSAS031958-TX-M04922-180110_noNmin100_65x_oDf	noNmin100	500cyc	1239700	35.69	29.8	0	0	50.46	240.18	376.83	354	46	282934	910858	73	120778	288746	0.8042	0.5261	0.9548
PNUSAS032349-OR-M05181-180117_noNmin100_65x_oTh	noNmin100	500cyc	1239738	34.13	31.84	0	0	58.49	240.71	379.05	351	30	580271	1787765	25	397717	902166	0.8935	0.6638	0.9657
PNUSAS036521-MI-M03277-180320_noNmin100_65x_oTh	noNmin100	500cyc	1190038	35.27	31.41	0	0	37.69	247.05	544.58	540	184	111477	222631	126	65891	215880	0.6958	0.5783	0.7956
PNUSAS036910-GA-M70384-180315_noNmin100_65x_oTh	noNmin100	500cyc	1211872	34.55	32.15	0	0	57.7	245.67	476.76	454	45	683083	1787590	38	216018	726047	0.8907	0.7782	0.9635
PNUSAS037915-MN-M02199-180403_noNmin100_65x_oTh	noNmin100	500cyc	1214100	35.09	29.7	0	0	55.56	245.8	427.91	411	48	209291	753275	80	111434	451024	0.8568	0.7006	0.9643		fastxOnly-3pr
APHI_17-9019_S33_fastx3x15_raw_65x_oTh	fastxOnly-3pr	500cyc	1564802	34.29	29.55	0.00460122	0.00293967	55.21	189.96	229.37	201	57	186321	537180	92	81661	298743	0.6737	0.8765	0.8456		qualR1avg	qualR2avg	readLength	medianInsert	contigCount.SPAdes	N50.SPAdes	maxContig.SPAdes	contigCount.Skesa	N50.Skesa	maxContig.Skesa	LyveSET.percentMap	lyveSET.properlyPaired	cfsan.percentMap
APHI_17-6335_S26_fastx3x15_raw_65x_oDf	fastxOnly-3pr	500cyc	1403116	33.75	32.51	0.0035635	0.00228064	59.11	212.07	291.36	264	33	396318	547368	61	144051	293526	0.5711	0.7061	0.9806		34.3676	30.3524	217.288	293.238	119.667	255934	591135	185.381	120424	304258	0.792138	0.709171	0.878495
APHI_17-10375_S35_fastx3x15_raw_65x_oDf	fastxOnly-3pr	500cyc	1376496	33.59	29.72	0.00450419	0.00261534	36.2	210.27	283.27	257	302	76996	216002	265	28616	103170	0.5491	0.5908	0.7735
APHI_17-10777_S37_fastx3x15_raw_65x_oFiver	fastxOnly-3pr	500cyc	1361704	32.78	27.55	0.00308437	0.00146875	33.5	213.86	276.7	256	247	36955	137120	951	6875	28867	0.5854	0.4663	0.7082
APHI_17-12383_S27_fastx3x15_raw_65x_oTh	fastxOnly-3pr	500cyc	1347354	33.96	27.87	0.00430473	0.0026719	28.35	216	281.33	266	283	36938	113670	457	17137	71268	0.6195	0.4518	0.6714
APHI_17-12727_S28_fastx3x15_raw_65x_oTh	fastxOnly-3pr	500cyc	1296104	34.01	29.27	0.00401202	0.00462926	39.11	224.39	328.87	311	253	49435	191674	359	23062	81552	0.5654	0.5034	0.7011
APHI_17-12897_S29_fastx3x15_raw_65x_oTh	fastxOnly-3pr	500cyc	1304064	33.72	29.52	0.00567457	0.00245387	30.19	221.53	316.76	297	300	78474	201786	329	22999	84200	0.7832	0.5264	0.7446
APHI_17-13313_S30_fastx3x15_raw_65x_oSeven	fastxOnly-3pr	500cyc	1287212	33.83	28.79	0.00621498	0.00372899	29.62	226.01	351.23	332	393	41703	165985	509	15779	58752	0.9326	0.4688	0.6871
APHI_18-154_S31_fastx3x15_raw_65x_oDf	fastxOnly-3pr	500cyc	1348960	33.57	30.58	0.00548571	0.00341003	36.32	209.93	276.35	251	52	200589	395794	71	125717	360132	0.8996	0.821	0.9744
CVM_N17S1018_fastx3x15_raw_65x_oFiver	fastxOnly-3pr	600cyc	1305846	34.79	29.33	0.000765787	0.853087	52.18	225.5	273.86	229	33	398248	758233	36	247887	521512	0.8879	0.7985	0.9688
CVM_N17S1019_fastx3x15_raw_65x_oFiver	fastxOnly-3pr	600cyc	1297400	34.47	30.16	0.000308309	0.92431	55.11	227.8	275.83	237	36	346036	547368	48	257446	510349	0.9033	0.8295	0.9749
CVM_N17S1020_fastx3x15_raw_65x_oSeven	fastxOnly-3pr	600cyc	1231226	34.63	29.74	0.00016244	0.952546	47.1	236.26	291.22	253	38	490491	758465	46	197627	376875	0.8817	0.7927	0.9686
CVM_N17S1021_fastx3x15_raw_65x_oFiver	fastxOnly-3pr	600cyc	1329844	34.53	29.71	0.000451181	0.933493	51.76	219.41	259.23	219	35	450127	728458	42	197627	510235	0.8982	0.8208	0.9711
PNUSAS033882-NC-M5236-180215--_S6_fastx3x15_raw_65x_oSeven	fastxOnly-3pr	500cyc	1503298	35.33	32.18	0.000458184	0.000152728	58.55	197.13	295.56	259	53	222372	547926	85	100777	222468	0.896	0.6963	0.9495
PNUSAS034531-LAC-M05385-180221_S8_fastx3x15_raw_65x_oSeven	fastxOnly-3pr	500cyc	1722520	34.21	30.76	0.00030843	0.000462645	56.72	171.73	210.38	176	40	297359	547368	73	105740	223679	0.8501	0.8381	0.9096
PNUSAS034535-NC-M5236-180215--_S7_fastx3x15_raw_65x_oTh	fastxOnly-3pr	500cyc	1493134	35.3	32.84	2.03725	7.00965	59.61	198.77	287.67	255	65	135470	323858	136	62816	181822	0.9163	0.8378	0.9641
PNUSAS031958-TX-M04922-180110_fastx3x15_raw_65x_oFiver	fastxOnly-3pr	500cyc	1309518	35.73	30.42	4.53266	3.33024	52.53	227.38	375.69	352	43	302674	771622	65	138465	431196	0.8367	0.7858	0.9608
PNUSAS032349-OR-M05181-180117_fastx3x15_raw_65x_oSeven	fastxOnly-3pr	500cyc	1296892	34.19	32.28	2.00156	6.98035	59.01	229.75	378.13	349	42	580383	1787762	27	352819	902165	0.9041	0.8651	0.9671
PNUSAS036521-MI-M03277-180320_fastx3x15_raw_65x_oTh	fastxOnly-3pr	500cyc	1239718	35.3	31.8	0.000483981	0.000483981	43.28	235.92	556.87	532	119	128523	477922	121	70226	202594	0.7053	0.6131	0.7965
PNUSAS036910-GA-M70384-180315_fastx3x15_raw_65x_oTh	fastxOnly-3pr	500cyc	1270086	34.6	32.58	0.000944818	0.00015747	58.32	234.17	472.13	452	42	637184	1530027	41	227048	701685	0.8999	0.8297	0.9643
PNUSAS037915-MN-M02199-180403_fastx3x15_raw_65x_oTh	fastxOnly-3pr	500cyc	1268178	35.14	30.24	0.00047312	0.000315413	56.88	235.2	426.71	410	47	282020	1128255	79	104529	224630	0.8758	0.7741	0.9666		noNmin100-3pr
APHI_17-6335_S26_L001_noNmin100_fastx3x15_65x	noNmin100-3pr	500cyc	1491040	33.59	32.78	0	0	59.27	216.3	298.44	269	37	280608	547368	63	126312	343675	0.6732	0.8769	0.8456		qualR1avg	qualR2avg	readLength	medianInsert	contigCount.SPAdes	N50.SPAdes	maxContig.SPAdes	contigCount.Skesa	N50.Skesa	maxContig.Skesa	LyveSET.percentMap	lyveSET.properlyPaired	cfsan.percentMap
APHI_17-9019_S33_L001_noNmin100_fastx3x15_65x	noNmin100-3pr	500cyc	1376072	34.16	29.8	0	0	55.58	199.01	244.03	213	68	142343	514028	108	81297	178876	0.5713	0.7013	0.981		34.171	30.5767	223.381	300.143	91.7619	265307	625007	185.667	119508	326246	0.793424	0.712086	0.879714
APHI_17-10375_S35_L001_noNmin100_fastx3x15_65x	noNmin100-3pr	500cyc	1342460	33.42	30	0	0	43.46	214.96	290.77	257	120	81514	234449	260	30020	91374	0.549	0.5908	0.7745
APHI_17-10777_S37_L001_noNmin100_fastx3x15_65x	noNmin100-3pr	500cyc	1329974	32.57	27.84	0	0	33.75	217.89	285.23	258	252	32712	119340	938	7266	42120	0.586	0.4688	0.7103
APHI_17-12383_S27_L001_noNmin100_fastx3x15_65x	noNmin100-3pr	500cyc	1313224	33.81	28.12	0	0	33.53	220.41	282.67	263	227	44858	91088	460	17478	65646	0.6189	0.4535	0.6729
APHI_17-12727_S28_L001_noNmin100_fastx3x15_65x	noNmin100-3pr	500cyc	1268884	33.84	29.55	0	0	36.39	227.9	330.52	311	213	46297	128158	362	25471	91315	0.5655	0.5058	0.7015
APHI_17-12897_S29_L001_noNmin100_fastx3x15_65x	noNmin100-3pr	500cyc	1277000	33.54	29.8	0	0	36.55	225.3	327.34	295	135	66718	192055	337	23145	84381	0.7802	0.5272	0.7454
APHI_17-13313_S30_L001_noNmin100_fastx3x15_65x	noNmin100-3pr	500cyc	1262100	33.66	29.07	0	0	33.07	229.65	334.92	319	236	42544	178638	491	16412	69597	0.933	0.4706	0.6882
APHI_18-154_S31_L001_noNmin100_fastx3x15_65x	noNmin100-3pr	500cyc	1308458	33.39	30.85	0	0	36.25	215.15	287.18	259	45	212058	396528	77	99478	203918	0.9009	0.8231	0.9753
CVM_N17S1018_noNmin100_fastx3x15_65x	noNmin100-3pr	600cyc	1265042	34.47	29.94	0	0	53.26	232.84	288.16	243	31	490626	758057	32	330940	671757	0.896	0.8152	0.9716
CVM_N17S1019_noNmin100_fastx3x15_65x	noNmin100-3pr	600cyc	1258828	34.15	30.81	0	0	55.9	234.09	287.7	248	30	510824	729157	48	207789	403328	0.9125	0.8472	0.9784
CVM_N17S1020_noNmin100_fastx3x15_65x	noNmin100-3pr	600cyc	1203040	34.31	30.37	0	0	44.8	241.41	305.61	268	33	547368	758889	46	206446	345484	0.8922	0.8135	0.972
CVM_N17S1021_noNmin100_fastx3x15_65x	noNmin100-3pr	600cyc	1285676	34.22	30.35	0	0	52.71	227.04	271.21	231	33	390051	758057	43	216131	510227	0.9063	0.8366	0.9743
PNUSAS033882-NC-M5236-180215_noNmin100_fastx3x15_65x	noNmin100-3pr	500cyc	1400768	34.14	31.18	0	0	58.84	211.46	321.25	281	44	398173	695506	83	109174	235685	0.8955	0.6901	0.9507
PNUSAS034531-LAC-M05385-180221_noNmin100_fastx3x15_65x	noNmin100-3pr	500cyc	1529136	34.14	31.18	0	0	57.03	193.19	240.57	205	44	227661	637566	65	130860	314297	0.8494	0.8366	0.9127
PNUSAS034535-NC-M5236-180215_noNmin100_fastx3x15_65x	noNmin100-3pr	500cyc	1413990	35.2	33.16	0	0	59.86	210.04	307.77	270	80	108170	316219	140	60030	216047	0.9169	0.8364	0.9652
PNUSAS031958-TX-M04922-180110_noNmin100_fastx3x15_65x_oDf	noNmin100-3pr	500cyc	1288568	35.73	30.42	0	0	51.82	231.17	382.09	358	49	250738	672153	68	133166	288854	0.8335	0.7826	0.9603
PNUSAS032349-OR-M05181-180117_noNmin100_fastx3x15_65x_oTh	noNmin100-3pr	500cyc	1285432	34.19	32.27	0	0	58.99	231.68	380.15	351	39	580241	1787766	27	298743	1706549	0.9032	0.8658	0.967
PNUSAS036521-MI-M03277-180320_noNmin100_fastx3x15_65x_oTh	noNmin100-3pr	500cyc	1230000	35.31	31.8	0	0	44.25	238.07	547.96	536	126	120189	692678	123	64727	194250	0.7038	0.6107	0.7958
PNUSAS036910-GA-M70384-180315_noNmin100_fastx3x15_65x_oDf	noNmin100-3pr	500cyc	1257674	34.61	32.58	0	0	58.24	236.64	478.57	456	40	718722	1787586	44	213357	577888	0.8997	0.8289	0.9646
PNUSAS037915-MN-M02199-180403_noNmin100_fastx3x15_65x_oTh	noNmin100-3pr	500cyc	1259942	35.14	30.24	0	0	56.9	236.81	430.81	412	45	279027	1129871	84	111434	215908	0.8749	0.7722	0.9667		prinseq
APHI_17-9019_S33_L001_1Nwin40q28min50_65x	prinseq	500cyc	1672724	35.6	33	0.000956524	0	63.05	177.77	237.68	206	52	177697	637570	79	112588	345723	0.8613	0.7847	0.8797		qualR1avg	qualR2avg	readLength	medianInsert	contigCount.SPAdes	N50.SPAdes	maxContig.SPAdes	contigCount.Skesa	N50.Skesa	maxContig.Skesa	LyveSET.percentMap	lyveSET.properlyPaired	cfsan.percentMap
APHI_17-6335_S26_L001_1Nwin40q28min50_65x	prinseq	500cyc	1470678	34.77	34.28	0.000951942	0.000135992	63.31	202.59	294.23	265	31	450588	547368	58	147540	343675	0.9856	0.5928	0.9965		35.4219	33.209	200.474	296.19	77.5238	270566	653149	140.19	135941	362803	0.870705	0.684571	0.90271
APHI_17-10375_S35_L001_1Nwin40q28min50_65x	prinseq	500cyc	1504726	34.93	32.74	0.000797487	0	45.25	191.96	275.23	245	122	77038	203174	210	39595	120183	0.752	0.5762	0.8019
APHI_17-10777_S37_L001_1Nwin40q28min50_65x	prinseq	500cyc	1574930	34.45	31.37	0.00012699	0	29.81	183.93	283.59	258	192	46394	108304	534	14348	60912	0.6793	0.5181	0.7502
APHI_17-12383_S27_L001_1Nwin40q28min50_65x	prinseq	500cyc	1495228	35.54	32.13	0.000267518	0	41.43	193.01	278.11	259	201	46725	115740	343	24316	98180	0.6425	0.4871	0.7093
APHI_17-12727_S28_L001_1Nwin40q28min50_65x	prinseq	500cyc	1426426	35.31	32.61	0.000280421	0	39.83	203.36	321.59	300	168	60077	185854	285	29948	144448	0.6594	0.544	0.7267
APHI_17-12897_S29_L001_1Nwin40q28min50_65x	prinseq	500cyc	1440710	35.09	32.73	0.000555282	0	36.28	200.23	317.14	289	116	78478	236552	262	28476	113190	0.704	0.5647	0.773
APHI_17-13313_S30_L001_1Nwin40q28min50_65x	prinseq	500cyc	1437122	35.25	32.33	0.000417501	0	38.51	202.23	345.76	320	191	46237	158851	387	20135	74302	0.6513	0.5451	0.7134
APHI_18-154_S31_L001_1Nwin40q28min50_65x	prinseq	500cyc	1448808	34.73	33.12	0.000690223	0.000138045	41.57	195.44	276.84	252	41	212058	526641	77	97805	275115	0.9747	0.755	0.996
CVM_N17S1018_1Nwin40q28min50_65x	prinseq	600cyc	1424680	35.41	32.92	0	0.000140382	58.52	206.37	290.76	244	29	490632	758554	31	324113	841349	0.9796	0.6749	0.9941
CVM_N17S1019_1Nwin40q28min50_65x	prinseq	600cyc	1398014	35.13	33.27	0	0.00042918	60.67	210.59	289.28	248	31	369186	758659	41	202784	369093	0.9828	0.6866	0.9947
CVM_N17S1020_1Nwin40q28min50_65x	prinseq	600cyc	1342654	35.3	33.11	0	0.000148959	52.22	215.68	308.7	264	33	547368	789207	38	197627	764050	0.9757	0.6935	0.9931
CVM_N17S1021_1Nwin40q28min50_65x	prinseq	600cyc	1431466	35.22	33.11	0	0.000419151	57.22	203.05	271.22	231	30	481698	758653	41	255895	501698	0.981	0.6617	0.9945
PNUSAS033882-NC-M5236-180215--_S6_L001_1Nwin40q28min50_65x	prinseq	500cyc	1543140	35.99	34.24	1.93359	4.47192	63.02	192.17	306.43	265	47	234877	780347	72	137918	295290	0.9446	0.8451	0.9651
PNUSAS034531-LAC-M05385-180221_S8_L001_1Nwin40q28min50_65x	prinseq	500cyc	1788066	35.26	33.42	2.11938	0.014429	62.6	164.94	222.15	187	42	288979	547368	53	164419	550427	0.9117	0.8624	0.9332
PNUSAS034535-NC-M5236-180215--_S7_L001_1Nwin40q28min50_65x	prinseq	500cyc	1523904	35.92	34.61	1.90379	4.2945	63.07	194.54	293.94	258	73	136064	322257	129	66066	192006	0.9584	0.7248	0.9774
PNUSAS031958-TX-M04922-180110_1Nwin40q28min50_65x_oFiver	prinseq	500cyc	1470270	36.69	33.17	0	0	61.02	202.54	404.34	369	39	344179	1147951	59	138459	359653	0.9715	0.6216	0.9946
PNUSAS032349-OR-M05181-180117_1Nwin40q28min50_65x_oFiver	prinseq	500cyc	1388794	35.34	34.07	0	0	63.57	214.76	381.88	350	31	580231	1787810	26	397895	902163	0.9651	0.7331	0.981
PNUSAS036521-MI-M03277-180320_1Nwin40q28min50_65x	prinseq	500cyc	1319952	36.29	34.24	0	0	50.66	222.16	575.88	539	81	134242	761457	111	81297	227757	0.77	0.7015	0.8148
PNUSAS036910-GA-M70384-180315_1Nwin40q28min50_65x	prinseq	500cyc	1349108	35.57	34.19	0	0	63.11	220.7	475.34	454	33	656438	1787591	35	246398	804386	0.9574	0.892	0.9768
PNUSAS037915-MN-M02199-180403_1Nwin40q28min50_65x	prinseq	500cyc	1275936	36.07	32.73	0	0	57.84	211.94	436.93	417	45	222707	796215	73	127140	235257	0.9769	0.9111	0.9909		prinseq-5pr3pr
APHI_17-9019_S33_L001_1Nwin40q28min50_f2_fastx5_65x	prinseq-5pr3pr	500cyc	1735336	35.71	33.22	0.00103726	0	62.66	170.75	231.23	202	58	176200	580337	89	89271	225269	0.8637	0.9779	0.8797		qualR1avg	qualR2avg	readLength	medianInsert	contigCount.SPAdes	N50.SPAdes	maxContig.SPAdes	contigCount.Skesa	N50.Skesa	maxContig.Skesa	LyveSET.percentMap	lyveSET.properlyPaired	cfsan.percentMap
APHI_17-6335_S26_L001_1Nwin40q28min50_f2_fastx5_65x	prinseq-5pr3pr	500cyc	1523562	34.89	34.46	0.000787628	0	63.41	195.58	290.53	261	34	389872	547368	56	147477	257198	0.9881	0.8503	0.9966		35.6095	33.6152	193.464	293.19	76.8095	277891	658148	142.381	134227	344451	0.873486	0.850486	0.902652
APHI_17-10375_S35_L001_1Nwin40q28min50_f2_fastx5_65x	prinseq-5pr3pr	500cyc	1558672	35.05	32.97	0.000513257	0	47.13	184.92	276.14	246	114	81601	264263	226	37925	91765	0.7549	0.7286	0.8013
APHI_17-10777_S37_L001_1Nwin40q28min50_f2_fastx5_65x	prinseq-5pr3pr	500cyc	1632882	34.59	31.63	0.000122483	0	29.06	176.94	279.67	254	202	41492	115723	561	12591	58216	0.6838	0.6468	0.7497
APHI_17-12383_S27_L001_1Nwin40q28min50_f2_fastx5_65x	prinseq-5pr3pr	500cyc	1547706	35.64	32.36	0.000387671	0	40.34	185.92	272.99	254	189	46184	146138	349	23127	78918	0.6462	0.6171	0.7089
APHI_17-12727_S28_L001_1Nwin40q28min50_f2_fastx5_65x	prinseq-5pr3pr	500cyc	1471670	35.42	32.84	0.0005436	0	38.38	196.25	325.53	303	169	53960	158284	288	30580	82364	0.6632	0.631	0.7263
APHI_17-12897_S29_L001_1Nwin40q28min50_f2_fastx5_65x	prinseq-5pr3pr	500cyc	1488544	35.21	32.96	0.000537438	0	38.79	193.18	305.26	284	119	78792	236579	253	28352	102571	0.7084	0.6689	0.7728
APHI_17-13313_S30_L001_1Nwin40q28min50_f2_fastx5_65x	prinseq-5pr3pr	500cyc	1484542	35.37	32.56	0.000404165	0	39.78	195.2	348.48	314	189	53967	191781	389	19494	74303	0.6554	0.6184	0.7132
APHI_18-154_S31_L001_1Nwin40q28min50_f2_fastx5_65x	prinseq-5pr3pr	500cyc	1497648	34.85	33.32	0.000667714	0.000133543	42.8	188.39	272.37	248	43	199898	412217	67	127177	275115	0.9772	0.9587	0.9961
CVM_N17S1018_1Nwin40q28min50_f2_fastx5_65x	prinseq-5pr3pr	600cyc	1473156	35.6	33.27	0	0.000135763	58.66	199.38	286.62	240	29	490628	758554	32	298743	510346	0.9817	0.9631	0.9945
CVM_N17S1019_1Nwin40q28min50_f2_fastx5_65x	prinseq-5pr3pr	600cyc	1448122	36.1	35.19	0	0	59.66	198.71	284.72	244	29	481698	758364	40	227414	734941	0.9845	0.9691	0.995
CVM_N17S1020_1Nwin40q28min50_f2_fastx5_65x	prinseq-5pr3pr	600cyc	1384880	36.16	34.99	0	0	51.23	203.67	307.51	260	30	547368	759089	41	207738	501708	0.9779	0.9561	0.9936
CVM_N17S1021_1Nwin40q28min50_f2_fastx5_65x	prinseq-5pr3pr	600cyc	1487816	35.41	33.45	0	0	57.53	196.03	267.43	227	33	398252	758350	36	227223	547366	0.9827	0.9667	0.9947
PNUSAS033882-NC-M5236-180215--_S6_L001_1Nwin40q28min50_f2_fastx5_65x	prinseq-5pr3pr	600cyc	1600574	36.08	34.46	1.8802	4.41454	63.18	185.18	303.48	261	44	272411	765293	70	122752	314297	0.9474	0.9471	0.9654
PNUSAS034531-LAC-M05385-180221_S8_L001_1Nwin40q28min50_f2_fastx5_65x	prinseq-5pr3pr	500cyc	1867538	35.39	33.68	1.90561	0	62.49	157.92	216.03	183	35	389883	637570	57	152187	314782	0.9136	0.9516	0.9328
PNUSAS034535-NC-M5236-180215--_S7_L001_1Nwin40q28min50_f2_fastx5_65x	prinseq-5pr3pr	500cyc	1581982	36.01	34.81	1.84427	4.28222	63.04	187.64	290.61	255	60	176079	383484	128	68728	191891	0.9608	0.9323	0.9777
PNUSAS031958-TX-M04922-180110_1Nwin40q28min50_f2_fastx5_65x_oTh	prinseq-5pr3pr	500cyc	1507930	36.75	33.55	0	0	61.29	197.57	402.14	367	41	369336	1247384	56	140662	296546	0.9758	0.9	0.9946
PNUSAS032349-OR-M05181-180117_1Nwin40q28min50_f2_fastx5_65x_oDf	prinseq-5pr3pr	500cyc	1420796	35.42	34.29	0	0	63.57	209.72	378.16	348	31	581349	1787800	27	397717	1308470	0.967	0.9476	0.9809
PNUSAS036521-MI-M03277-180320_1Nwin40q28min50_f2_fastx5_65x_oTh	prinseq-5pr3pr	500cyc	1348600	36.35	34.46	0	0	49.39	217.14	560.65	538	82	133823	761459	109	76991	227769	0.7725	0.7294	0.8144
PNUSAS036910-GA-M70384-180315_1Nwin40q28min50_f2_fastx5_65x_oTh	prinseq-5pr3pr	500cyc	1381082	35.66	34.41	0	0	63.19	215.72	472.53	453	34	656332	1787591	37	258184	804385	0.9594	0.9366	0.9766
PNUSAS037915-MN-M02199-180403_1Nwin40q28min50_f2_fastx5_65x_oTh	prinseq-5pr3pr	500cyc	1277474	36.14	33.04	0	0	56.63	206.94	434.99	415	48	216591	763478	79	124438	235257	0.979	0.9629	0.9909		prinseq-3pr
APHI_17-9019_S33_L001_fas3x5win40q28min50_65x_df	prinseq-3pr	500cyc	1706698	35.65	33.2	0.00117185	0	62.97	173.71	237.17	206	64	156410	363289	78	103190	314287	0.8633	0.9778	0.8795		qualR1avg	qualR2avg	readLength	medianInsert	contigCount.SPAdes	N50.SPAdes	maxContig.SPAdes	contigCount.Skesa	N50.Skesa	maxContig.Skesa	LyveSET.percentMap	lyveSET.properlyPaired	cfsan.percentMap
APHI_17-6335_S26_L001_fas3x5win40q28min50_65x_df	prinseq-3pr	500cyc	1499850	34.83	34.44	0.000933427	0.000133347	63.39	198.61	294.23	265	32	390037	547368	64	135263	257198	0.9878	0.8502	0.9965		35.4871	33.4486	196.468	296.476	76.5238	270004	602090	139.524	130616	345242	0.873019	0.850324	0.902495
APHI_17-10375_S35_L001_fas3x5win40q28min50_65x_df	prinseq-3pr	500cyc	1533262	34.99	32.95	0.000652204	0	46.64	187.9	282.12	251	110	96265	264206	216	36687	120180	0.754	0.7277	0.801
APHI_17-10777_S37_L001_fas3x5win40q28min50_65x_mFiv	prinseq-3pr	500cyc	1606302	34.52	31.61	0.00012451	0	36.05	179.93	283.91	254	187	42283	134122	533	13249	54160	0.6827	0.6456	0.7495
APHI_17-12383_S27_L001_fas3x5win40q28min50_65x_th	prinseq-3pr	500cyc	1523242	35.58	32.34	0.000393897	0	41.51	188.95	278.66	259	183	44867	115699	346	23049	98180	0.6455	0.6166	0.7086
APHI_17-12727_S28_L001_fas3x5win40q28min50_65x_df	prinseq-3pr	500cyc	1451698	35.36	32.81	0.000688849	0	39.01	199.32	325.86	304	161	57680	185695	276	30617	104321	0.6621	0.6299	0.7258
APHI_17-12897_S29_L001_fas3x5win40q28min50_65x_thver	prinseq-3pr	500cyc	1466126	35.14	32.93	0.000545656	0	36.55	196.19	300.38	281	117	84020	236397	249	30968	93322	0.7071	0.6676	0.7726
APHI_17-13313_S30_L001_fas3x5win40q28min50_65x_thver	prinseq-3pr	500cyc	1461452	35.3	32.54	0.000410551	0	40.02	198.18	341.37	318	192	46067	185836	388	20135	60042	0.654	0.6169	0.7126
APHI_18-154_S31_L001_fas3x5win40q28min50_65x_mFiv	prinseq-3pr	500cyc	1474254	34.78	33.3	0.000813971	0.000135662	41.58	191.42	280.34	254	41	229581	396499	70	125673	324454	0.9771	0.959	0.996
CVM_N17S1018_fas3x5win40q28min50_65x_mFiv	prinseq-3pr	600cyc	1451820	35.52	33.27	0	0	58.69	202.33	291.89	244	29	454988	672063	34	257453	510345	0.9814	0.9638	0.9945
CVM_N17S1019_fas3x5win40q28min50_65x_mFiv	prinseq-3pr	600cyc	1426192	35.25	33.6	0	0	60.94	206.61	288.74	248	28	547368	871707	39	202584	399299	0.9841	0.9696	0.9949
CVM_N17S1020_fas3x5win40q28min50_65x_th	prinseq-3pr	600cyc	1367360	35.42	33.45	0	0	52.35	211.65	311.59	264	35	398252	871689	42	208645	509341	0.9775	0.9566	0.9934
CVM_N17S1021_fas3x5win40q28min50_65x_thver	prinseq-3pr	600cyc	1463690	35.33	33.44	0	0	57.47	199.13	271.86	231	30	449972	758653	36	247607	510366	0.9825	0.9675	0.9945
PNUSAS033882-NC-M5236-180215--_S6_L001_fas3x5win40q28min50_65x_mFiv	prinseq-3pr	500cyc	1575128	36.03	34.43	1.90092	4.43202	63.14	188.2	306.23	265	45	254827	462681	72	133166	235596	0.9468	0.948	0.9652
PNUSAS034531-LAC-M05385-180221_S8_L001_fas3x5win40q28min50_65x_mFiv	prinseq-3pr	500cyc	1830608	35.32	33.65	2.04402	0	62.6	160.97	222.5	187	42	293515	902549	60	134107	526571	0.9135	0.9519	0.9332
PNUSAS034535-NC-M5236-180215--_S7_L001_fas3x5win40q28min50_65x_thver	prinseq-3pr	500cyc	1558766	35.96	34.79	1.86673	4.28185	63.31	190.66	294	258	67	158036	357058	123	70932	216087	0.9604	0.9317	0.9775
PNUSAS031958-TX-M04922-180110_fas3x5win40q28min50_65x	prinseq-3pr	500cyc	1502084	36.74	33.54	0	0	61.33	198.53	404.74	370	41	375316	1247347	54	147376	577875	0.9761	0.9003	0.9947
PNUSAS032349-OR-M05181-180117_fas3x5win40q28min50_65x	prinseq-3pr	500cyc	1416874	35.4	34.27	0	0	63.68	210.71	379.74	350	30	580339	1787766	28	396425	1234154	0.9669	0.9476	0.9808
PNUSAS036521-MI-M03277-180320_fas3x5win40q28min50_65x	prinseq-3pr	500cyc	1342184	36.34	34.44	0	0	47.9	218.15	567.81	546	91	134250	391661	107	77463	227750	0.7723	0.7288	0.8142
PNUSAS036910-GA-M70384-180315_fas3x5win40q28min50_65x	prinseq-3pr	500cyc	1375288	35.64	34.4	0	0	63.19	216.73	472.93	454	35	659411	1128123	38	223916	641293	0.9593	0.9366	0.9765
PNUSAS037915-MN-M02199-180403_fas3x5win40q28min50_65x	prinseq-3pr	500cyc	1276034	36.13	33.02	0	0	56.83	207.94	436.97	417	47	216592	763480	77	124438	235257	0.979	0.9631	0.9909		bayesHammer
bayesAPHI_17-9019_S33_L001_65x	bayesHammer	500cyc	1490904	34.19	29.64	0.00107317	0.000536587	58.17	198.51	240.81	208	61	146233	479512	81	95861	216076	0.8179	0.7137	0.8612		qualR1avg	qualR2avg	readLength	medianInsert	contigCount.SPAdes	N50.SPAdes	maxContig.SPAdes	contigCount.Skesa	N50.Skesa	maxContig.Skesa	LyveSET.percentMap	lyveSET.properlyPaired	cfsan.percentMap
bayesAPHI_17-6335_S26_L001_65x	bayesHammer	500cyc	1343956	33.55	32.49	0.00133933	0.000744072	60.6	221.02	296.97	268	35	301842	547368	52	147540	366409	0.9545	0.5243	0.9867		34.2105	30.2876	226.102	299.571	86	253006	581314	128.333	152297	366842	0.824838	0.607219	0.890176
bayesAPHI_17-10375_S35_L001_65x	bayesHammer	500cyc	1320102	33.41	29.73	0.00212105	0.00151503	43.25	219.13	287.66	257	134	72714	358723	206	37929	120128	0.7025	0.49	0.7858
bayesAPHI_17-10777_S37_L001_65x	bayesHammer	500cyc	1306578	32.57	27.56	0.00091843	0.000459215	35.25	222.58	291.87	263	240	33525	110301	458	16378	65292	0.6049	0.4041	0.7242
bayesAPHI_17-12383_S27_L001_65x	bayesHammer	500cyc	1294358	33.88	27.99	0.00108162	0.00108162	38.94	224.55	290.01	271	220	39562	115988	328	25018	91706	0.5893	0.4154	0.6931
bayesAPHI_17-12727_S28_L001_65x	bayesHammer	500cyc	1247122	33.87	29.32	0.00192443	0.00192443	40.61	233.2	330.66	312	188	52167	170408	276	29101	101050	0.6195	0.4864	0.7162
bayesAPHI_17-12897_S29_L001_65x	bayesHammer	500cyc	1254322	33.55	29.54	0.00159449	0.00111614	36.53	230.41	330.5	296	134	75733	236362	208	35611	130854	0.6508	0.4808	0.7593
bayesAPHI_17-13313_S30_L001_65x	bayesHammer	500cyc	1238016	33.7	28.85	0.00177704	0.00161549	38.79	234.87	355.11	330	221	35950	188740	365	22396	118392	0.6039	0.4698	0.7035
bayesAPHI_18-154_S31_L001_65x	bayesHammer	500cyc	1296784	33.4	30.6	0.00138805	0.00107959	40.83	218.74	287.44	260	41	295087	412024	51	144386	393268	0.931	0.6734	0.9839
bayesCVM_N17S1018_65x	bayesHammer	600cyc	1259698	34.43	29.34	0.000158768	0.832581	54.91	234.06	291.58	243	28	505010	758550	32	303065	758482	0.9246	0.5935	0.9785
bayesCVM_N17S1019_65x	bayesHammer	600cyc	1244512	34.07	30.16	0	0.852864	57.21	236.6	289.89	247	28	399321	672736	30	345717	586377	0.9343	0.6035	0.982
bayesCVM_N17S1020_65x	bayesHammer	600cyc	1186168	34.25	29.74	0.00016861	0.88925	49.27	244.99	309	267	29	395903	730230	32	270159	540601	0.9184	0.6052	0.9773
bayesCVM_N17S1021_65x	bayesHammer	600cyc	1278432	34.13	29.71	0.000156442	0.836181	53.84	228.13	271.87	227	29	399321	758659	39	281637	547366	0.9283	0.5794	0.9787
bayesPNUSAS033882-NC-M5236-180215--_S6_L001_65x	bayesHammer	500cyc	1433440	35.2	32.18	0.0645998	0.0760409	60.35	206.12	304.18	266	46	345565	780326	68	149751	340024	0.9201	0.6817	0.9572
bayesPNUSAS034531-LAC-M05385-180221_S8_L001_65x	bayesHammer	500cyc	1636738	34	30.76	0.34862	0.78742	58.69	180.47	218.43	182	41	389887	637614	52	161913	494551	0.875	0.8005	0.9185
bayesPNUSAS034535-NC-M5236-180215--_S7_L001_65x	bayesHammer	500cyc	1426752	35.16	32.81	0.0665848	0.0679866	60.82	207.74	294.59	260	76	133819	315767	121	75896	267365	0.9343	0.6765	0.9691
bayesPNUSAS031958-TX-M04922-180110_65x	bayesHammer	500cyc	1259804	35.74	29.96	0	0	54.71	236.22	390.34	364	42	241932	627488	50	145469	343602	0.8778	0.5543	0.9749
bayesPNUSAS032349-OR-M05181-180117_65x	bayesHammer	500cyc	1246392	34.18	31.94	0	0	61.05	238.69	388.22	354	31	637475	1787766	23	479537	1234293	0.9342	0.6846	0.9751
bayesPNUSAS036521-MI-M03277-180320_65x	bayesHammer	500cyc	1196412	35.37	31.6	0	0	48.87	244.86	540.34	540	96	126206	441968	114	72427	215880	0.7403	0.6494	0.8117
bayesPNUSAS036910-GA-M70384-180315_65x	bayesHammer	500cyc	1222974	34.58	32.25	0	0	61.16	243.13	479.96	456	37	428252	1530203	41	247027	484390	0.9309	0.841	0.9729
bayesPNUSAS037915-MN-M02199-180403_65x	bayesHammer	500cyc	1220310	35.19	29.87	0	0	60.21	244.13	439.9	420	49	257618	546854	68	111412	287577	0.9291	0.8241	0.9839
