# Supplementary material for: Evaluating whole-genome sequencing quality metrics for enteric pathogen outbreaks
Source: PeerJ. 2021 Nov 25;9:e12446. doi: 10.7717/peerj.12446 (PMC8627651; doi:10.7717/peerj.12446)
Supplement: Supplemental Information 12 [file peerj-09-12446-s012.xlsx]

## Sheet: Cluster_1
E coli O26 - Cluster 1
lyveSET								precision	sensitivity	falseDiscovery rate
pipeline	total SNPs Called	Pos Total File	tp + fp	Union of others	unique SNPs (fp)	in Positives (tp)	Pos total (tp + fn)	tp / (tp + fp)	tp / (tp + fn)	1 - precision
raw	1007	fas3x15_noNmin100_fasNoNmin100_SNP.coords.txt	972	1127	0	972	1004	1	0.968127	0
noNmin100	1025	raw_fas3x15_fastxNoNmin100_SNP.coords.txt	973	1127	1	972	990	0.998972	0.981818	0.00102775
fastxOnly-3pr	1057	raw_noNmin100_fastxNoNmin100_SNP.coords.txt	974	1125	2	972	980	0.997947	0.991837	0.00205339
noNmin100-3pr	1073	raw_fas3x15_noNmin100_SNP.coords.txt	973	1125	1	972	972	0.998972	1	0.00102775
prinseq	1079	raw_fas3x15_noNmin100_SNP.coords.txt	972	1125	1	971	972	0.998971	0.998971	0.00102881
prinseq-5pr3pr	1099	fas3x5win40q28min50_fas3x15_noNmin100_SNP.coords.txt	1005	1125	2	1003	1003	0.99801	1	0.00199005
prinseq-3pr	1100	f1fas3x5win40q28min50_fas3x15_bayes_SNP.coords.txt	1024	1125	1	1023	1025	0.999023	0.998049	0.000976562
bayesHammer	1067	f1fas3x5win40q28min50_fas3x15_noNmin100_SNP.coords.txt	1006	1125	8	998	1005	0.992048	0.993035	0.00795229
CFSAN								precision	sensitivity	falseDiscovery rate
pipeline	Total SNPs Called	Pos Total File	tp + fp	Union of others	unique SNPs (fp)	in Positives (tp)	Pos total (tp + fn)	tp / (tp + fp)	tp / (tp + fn)	1 - precision
raw	2331	fas3x15_noNmin100_fasNoNmin100_SNP.coords.txt	2130	2598	13	2117	2132	0.993897	0.992964	0.00610329
noNmin100	2332	raw_fas3x15_fastxNoNmin100_SNP.coords.txt	2132	2597	15	2117	2164	0.992964	0.978281	0.00703565
fastxOnly-3pr	2305	raw_noNmin100_fastxNoNmin100_SNP.coords.txt	2131	2597	14	2117	2150	0.99343	0.984651	0.00656969
noNmin100-3pr	2294	raw_fas3x15_noNmin100_SNP.coords.txt	2121	2597	4	2117	2150	0.998114	0.984651	0.0018859
prinseq	2402	raw_fas3x15_noNmin100_SNP.coords.txt	2141	2597	8	2133	2150	0.996263	0.992093	0.00373657
prinseq-5pr3pr	2330	fas3x5win40q28min50_fas3x15_noNmin100_SNP.coords.txt	2139	2597	13	2126	2146	0.993922	0.99068	0.00607761
prinseq-3pr	2328	f1fas3x5win40q28min50_fas3x15_bayes_SNP.coords.txt	2148	2597	10	2138	2154	0.995345	0.992572	0.00465549
bayesHammer	2334	f1fas3x5win40q28min50_fas3x15_noNmin100_SNP.coords.txt	2134	2597	17	2117	2144	0.992034	0.987407	0.00796626

## Sheet: Cluster_2
Salmonella Reading
lyveSET								precision	sensitivity	falseDiscovery rate
	Total SNPs Called	Pos Total File	tp + fp	Union of others	unique SNPs	in Positives (tp)	Pos total (tp + fn)	tp / (tp + fp)	tp / (tp + fn)	1 - precision
raw	71	lyveSET_fas3x15_noNmin100_and_win40q28min50.coords.txt	67	96	0	67	76	1	0.881579	0
noNmin100	79	lyveSET_raw_fas3x15_and_win40q28min50	68	96	0	68	68	1	1	0
fastxOnly-3pr	83	lyveSET_raw_noNmin100_and_win40q28min50.coords.txt	67	96	0	67	68	1	0.985294	0
noNmin100-3pr	79	lyveSET_raw_fas3x15_and_bayesHammer.coord	65	96	0	65	68	1	0.955882	0
prinseq	88	lyveSET_raw_fas3x15_and_bayesHammer.coord	68	96	0	68	68	1	1	0
prinseq-5pr3pr	93	lyveSET_raw_noNmin100_and_win40q28min50.coords.txt	70	91	2	68	68	0.971429	1	0.0285714
prinseq-3pr	94	lyveSET_raw_noNmin100_and_win40q28min50.coords.txt	70	94	2	68	68	0.971429	1	0.0285714
bayesHammer	86	lyveSET_raw_noNmin100_and_win40q28min50.coords.txt	68	96	0	68	68	1	1	0
								precision	sensitivity	falseDiscovery rate
CFSAN	Total SNPs Called	Pos Total File	tp + fp	Union of others	unique SNPs	in Positives (tp)	Pos total (tp + fn)	tp / (tp + fp)	tp / (tp + fn)	1 - precision
raw	155	fas3x15_noNmin100_and_win40q28min50	140	184	1	139	140	0.992857	0.992857	0.00714286
noNmin100	163	raw_fas3x15_and_win40q28min50	143	185	4	139	143	0.972028	0.972028	0.027972
fastxOnly-3pr	154	raw_noNmin100_and_win40q28min50.coords.txt	139	181	0	139	148	1	0.939189	0
noNmin100-3pr	146	raw_fas3x15_and_bayesHammer.coord	139	184	0	139	146	1	0.952055	0
prinseq	163	raw_fas3x15_and_bayesHammer.coord	141	185	0	141	146	1	0.965753	0
prinseq-5pr3pr	166	raw_noNmin100_and_win40q28min50.coords.txt	141	185	0	141	148	1	0.952703	0
prinseq-3pr	162	raw_noNmin100_and_win40q28min50.coords.txt	142	185	0	142	148	1	0.959459	0
bayesHammer	160	raw_noNmin100_and_win40q28min50.coords.txt	143	183	2	141	148	0.986014	0.952703	0.013986

## Sheet: Cluster_3
Salmonella Pomona
lyveSET								precision	sensitivity	falseDiscovery rate
	Total SNPs Called	Pos Total File	tp + fp	Union of others	unique SNPs (fp)	in Positives (tp)	Pos total (tp + fn)	tp / (tp + fp)	tp / (tp + fn)	1 - precision
raw	412	lyveSET_fas3x15_noNmin100_fastxNoNmin100.coords.txt	390	450	0	390	397	1	0.982368	0
noNmin100	409	lyveSET_raw_fastx3x15_win40q27min40.coords.txt	392		0	392	404	1	0.970297	0
fastxOnly-3pr	422	lyveSET_raw_noNmin100_win40q27min40.coords.txt	392		0	392	397	1	0.987406	0
noNmin100-3pr	425	lyveSET_raw_noNmin100_win40q27min40.coords.txt	391		0	391	397	1	0.984887	0
prinseq	435	lyveSET_fas3x15_noNmin100_fastxNoNmin100.coords.txt	396		0	396	397	1	0.997481	0
prinseq-5pr3pr	439	lyveSET_raw_nonMin100_bayesHammer.coords.txt	391	450	0	391	395	1	0.989873	0
prinseq-3pr	443	lyveSET_raw_nonMin100_bayesHammer.coords.txt	395		0	395	395	1	1	0
bayesHammer	437	lyveSET_raw_noNmin100_win40q27min40.coords.txt	400	445	5	395	397	0.9875	0.994962	0.0125
CFSAN								precision	sensitivity	falseDiscovery rate
	Total SNPs Called	Pos Total File	tp + fp	Union of others	unique SNPs (fp)	in Positives (tp)	Pos total (tp + fn)	tp / (tp + fp)	tp / (tp + fn)	1 - precision
raw	709	fas3x15_noNmin100_fastxNoNmin100_SNP	693	775	0	693	699	1	0.991416	0
noNmin100	726	raw_fastx3x15_win40q27min40_SNP.coords.txt	696		0	696	698	1	0.997135	0
fastxOnly-3pr	711	raw_noNmin100_win40q27min40_SNP.coords	696		0	696	698	1	0.997135	0
noNmin100-3pr	721	raw_noNmin100_win40q27min40_SNP.coords	701		3	690	698	0.984308	0.988539	0.0156919
prinseq	746	fas3x15_noNmin100_fastxNoNmin100_SNP	713		14	695	699	0.974755	0.994278	0.0252454
prinseq-5pr3pr	724	raw_nonMin100_bayesHammer_SNP.coords.txt	691		0	691	701	1	0.985735	0
prinseq-3pr	724	raw_nonMin100_bayesHammer_SNP.coords.txt	696		0	696	701	1	0.992867	0
bayesHammer	741	raw_noNmin100_win40q27min40_SNP.coords	700	771	4	696	698	0.994286	0.997135	0.00571429

## Sheet: Cluster_4
Shigella sonnei
lyveSET								precision	sensitivity	falseDiscovery rate
	Total SNPs Called	Pos Total File	tp + fp	Union of others	unique SNPs (fp)	in Positives (tp)	Pos total (tp + fn)	tp / (tp + fp)	tp / (tp + fn)	1 - precision
raw	193	lyveSET_fas3x15_noNmin100_fastxNoNmin100	182	219	0	182	183	1	0.994536	0
noNmin100	188	lyveSET_raw_fas3x15_fas3x15noNmin100.coords.txt	183	219	1	182	187	0.994536	0.973262	0.00546448
fastxOnly-3pr	200	lyveSET_raw_noNmin100_fas3x15noNmin100.coords.txt	184	219	2	182	183	0.98913	0.994536	0.0108696
noNmin100-3pr	198	lyveSET_raw_fas3x15_noNmin100.coords.txt	182	219	0	182	184	1	0.98913	0
prinseq	199	lyveSET_raw_fas3x15_noNmin100.coords.txt	184	219	1	183	184	0.994565	0.994565	0.00543478
prinseq-5pr3pr	203	lyveSET_raw_fas3x15_bayesHammer.coords.txt	184	219	2	182	184	0.98913	0.98913	0.0108696
prinseq-3pr	205	lyveSET_raw_fas3x15_bayesHammer.coords.txt	185	219	3	182	184	0.983784	0.98913	0.0162162
bayesHammer	191	lyveSET_raw_fas3x15_min50q27win20.coords.txt	183	219	1	182	187	0.994536	0.973262	0.00546448
CFSAN								precision	sensitivity	falseDiscovery rate
	Total SNPs Called	Pos Total File	tp + fp	Union of others	unique SNPs (fp)	in Positives (tp)	Pos total (tp + fn)	tp / (tp + fp)	tp / (tp + fn)	1 - precision
raw	608	fas3x15_noNmin100_fastxNoNmin100_SNP.coords.txt	550	712	0	550	556	1	0.989209	0
noNmin100	615	raw_fas3x15_fas3x15noNmin100_SNP.coords.txt	556	712	6	550	558	0.989209	0.985663	0.0107914
fastxOnly-3pr	615	raw_noNmin100_fasNoNmin100_SNP.coords.txt	554	712	4	550	556	0.99278	0.989209	0.00722022
noNmin100-3pr	588	raw_fas3x15_noNmin100_SNP.coords.txt	552	712	2	550	564	0.996377	0.975177	0.00362319
prinseq	629	raw_fas3x15_noNmin100_SNP.coords.txt	578	712	15	563	564	0.974048	0.998227	0.0259516
prinseq-5pr3pr	611	raw_fas3x15_bayesHammer_SNP.coords.txt	550	712	2	548	562	0.996364	0.975089	0.00363636
prinseq-3pr	602	raw_fas3x15_bayesHammer_SNP.coords.txt	549	712	2	547	562	0.996357	0.97331	0.00364299
bayesHammer	615	raw_fas3x15_min50q27win20_SNP.coords.txt	568	703	11	557	566	0.980634	0.984099	0.0193662
